# Supplementary material for: Molecular Characterization of Three Tandemly Located Flagellin Genes of Stenotrophomonas maltophilia
Source: MDPI journal article supplement (doi:10.3390/ijms23073863), 2022-03-31
Supplement: s1 [file s1]

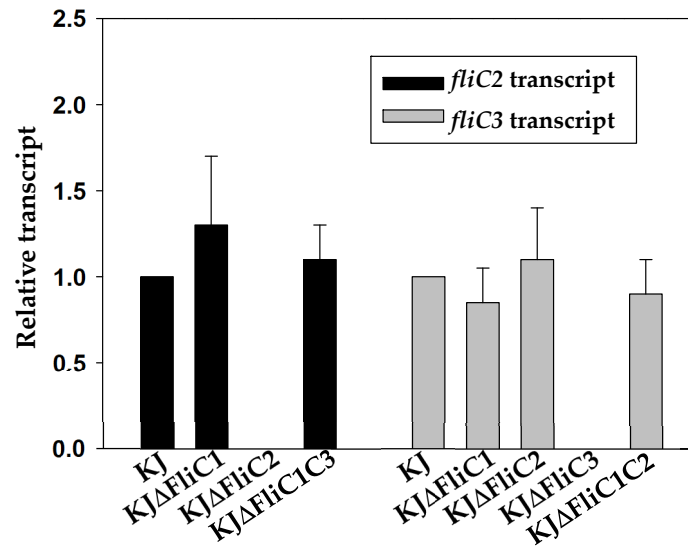

**Figure S1. Evaluation of polar effect in the *fliC*-associated mutants.** Overnight-cultured *S. maltophilia* tested was inoculated into fresh LB broth at an initial OD<sub>450nm</sub> of 0.15 and then further cultured for 5 h. The *fliC2* and *fliC3* transcripts of the strains indicated were quantified by qRT-PCR. Bars represent the mean from three independent experiments. Error bars represent the standard error (SD) of the mean. Data are expressed as mean  $\pm$  SD.

(A)

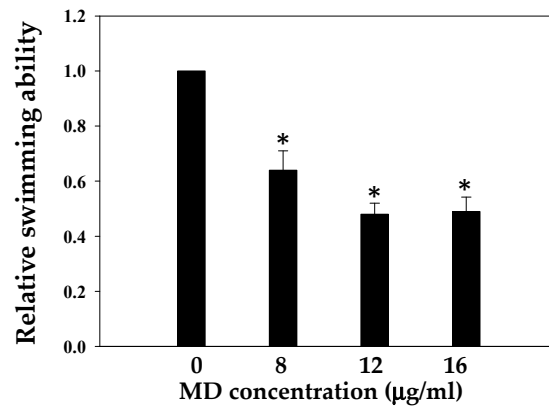

(B)

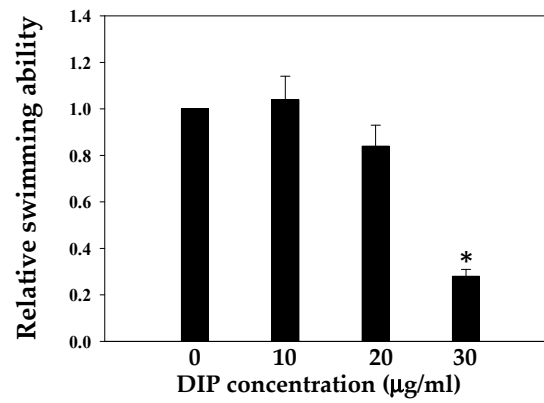

(C)

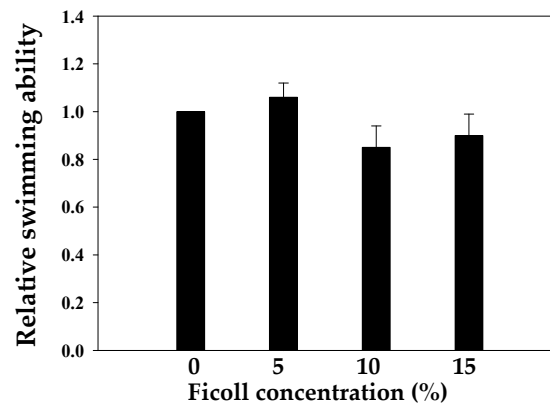

**Figure S2. The impact of MD, DIP, and Ficoll on swimming motility.** Five microliters of overnight-cultured *S. maltophilia* KJ cells were inoculated into swimming agar without and with additives of MD (A), DIP (B), and Ficoll (C), and then incubated at 37°C for 48 h. Swimming zones were recorded. The relative swimming motility was normalized to the condition of no additive. Data are the means from three independent experiments. Error bars indicate the standard deviations for three triplicate samples. \*,  $P < 0.05$ , significance calculated by Student's  $t$  test.

**Table S1 The numbers of flagellin gene in different genogroups of *S. maltophilia* complex**

| Strain       | Genogroup | No. of flagellin gene |
|--------------|-----------|-----------------------|
| 1189_SMAL    | 1         | 1                     |
| ISMMS6       | 1         | 2                     |
| ISMMS7       | 1         | 3                     |
| 30_SMAL      | 2-a       | 2                     |
| 53           | 2-a       | 2                     |
| C357         | 2-a       | 3                     |
| H_22_creteil | 2-a       | 2                     |
| SJTL3        | 2-b       | 3                     |
| AU12-09      | 3         | 3                     |
| 910          | 4         | 3                     |
| R551-3       | 5         | 3                     |
| RA8          | 5         | 3                     |
| K279a        | 6         | 3                     |
| WJ66         | 6         | 3                     |
| EPM1         | 6         | 3                     |
| 259_SMAL     | 7         | 1                     |
| G51          | 7         | 3                     |
| 5BA-1-2      | 9-a       | 3                     |
| EP20         | 9-b       | 3                     |
| SM-3123      | A         | 3                     |
| EA1          | B         | 3                     |
| D457         | C         | 3                     |
| M30          | C         | 3                     |
| ISMMS3       | D         | 3                     |
| 197_SMAL     | F         | 1                     |
| 22_SMAL      | F         | 2                     |
| E759         | F         | 3                     |
| MS_2009      | G         | 3                     |
| MF89         | H         | 2                     |
| ATCC19867    | H         | 3                     |
| JV3          | I         | 3                     |
| H_69_creteil | J         | 2                     |
| E301         | J         | 3                     |
| AA1          | Smc_1     | 2                     |
| LMG 978      | Single    | 3                     |

**Table S2. Bacterial strains, plasmids, and primers used in this study**

| Strain, plasmid, or primer   | Genotype or properties                                                                                                                                                                                 | Reference  |
|------------------------------|--------------------------------------------------------------------------------------------------------------------------------------------------------------------------------------------------------|------------|
| <b><i>S. maltophilia</i></b> |                                                                                                                                                                                                        |            |
| KJ                           | A clinical <i>S. maltophilia</i> isolate                                                                                                                                                               | 1          |
| KJΔFliC1                     | <i>S. maltophilia</i> KJ mutant of <i>fliC1</i> gene; Δ <i>fliC1</i>                                                                                                                                   | This study |
| KJΔFliC2                     | <i>S. maltophilia</i> KJ mutant of <i>fliC2</i> gene; Δ <i>fliC2</i>                                                                                                                                   | This study |
| KJΔFliC3                     | <i>S. maltophilia</i> KJ mutant of <i>fliC3</i> gene; Δ <i>fliC3</i>                                                                                                                                   | This study |
| KJΔFliC2C3                   | <i>S. maltophilia</i> KJ mutant of <i>fliC2</i> and <i>fliC3</i> genes; Δ <i>fliC2</i> , Δ <i>fliC3</i>                                                                                                | This study |
| KJΔFliC1C3                   | <i>S. maltophilia</i> KJ mutant of <i>fliC1</i> and <i>fliC3</i> genes; Δ <i>fliC1</i> , Δ <i>fliC3</i>                                                                                                | This study |
| KJΔFliC1C2                   | <i>S. maltophilia</i> KJ mutant of <i>fliC1</i> and <i>fliC2</i> genes; Δ <i>fliC1</i> , Δ <i>fliC2</i>                                                                                                | This study |
| KJΔFliC1C2C3                 | <i>S. maltophilia</i> KJ mutant of <i>fliC1</i> , <i>fliC2</i> , and <i>fliC3</i> genes; Δ <i>fliC1</i> , Δ <i>fliC2</i> , Δ <i>fliC3</i>                                                              | This study |
| <b><i>E. coli</i></b>        |                                                                                                                                                                                                        |            |
| DH5a                         | F- φ80d/ <i>acZ</i> Δ <i>M15</i> Δ( <i>lacZ</i> Y <i>A-argF</i> )U169 <i>deoR recA1 endA1 hsdR17</i> (r <sub>K</sub> <sup>-</sup> m <sub>K</sub> <sup>+</sup> ) <i>phoA supE44λ thi-1 gyrA96 relA1</i> | Invitrogen |
| S17-1                        | λ <i>pir</i> <sup>+</sup> mating strain                                                                                                                                                                |            |
| <b>Plasmids</b>              |                                                                                                                                                                                                        |            |
| pEX18Tc                      | <i>sacB oriT</i> , Tc <sup>r</sup>                                                                                                                                                                     | 3          |
| pRKXylE                      | Plasmid pRK415 containing a <i>xylE</i> cassette and the orientation of <i>xylE</i> gene being opposite to the orientation of <i>lacZ</i> promoter of pRK415; Tc <sup>r</sup>                          | 4          |
| pΔFliC1                      | pEX18Tc with an internal-deletion <i>fliC1</i> gene; Tc <sup>r</sup>                                                                                                                                   | This study |
| pΔFliC2                      | pEX18Tc with an internal-deletion <i>fliC2</i> gene; Tc <sup>r</sup>                                                                                                                                   | This study |
| pΔFliC3                      | pEX18Tc with an internal-deletion <i>fliC3</i> gene; Tc <sup>r</sup>                                                                                                                                   | This study |
| pFliC1 <sub>xylE</sub>       | pRK415 with a <i>P<sub>fliC1</sub>-xylE</i> promoter transcriptional fusion; Tc <sup>r</sup>                                                                                                           | This study |
| pFliC2 <sub>xylE</sub>       | pRK415 with a <i>P<sub>fliC2</sub>-xylE</i> promoter transcriptional fusion; Tc <sup>r</sup>                                                                                                           | This study |
| pFliC3 <sub>xylE</sub>       | pRK415 with a <i>P<sub>fliC3</sub>-xylE</i> promoter transcriptional fusion; Tc <sup>r</sup>                                                                                                           | This study |
| <b>Primers</b>               |                                                                                                                                                                                                        |            |
| FliC1N-F                     | 5'- CTGAGCTCGTACCAGCTGCA -3'                                                                                                                                                                           | This study |
| FliC1N-R                     | 5'- GAGGATCCAGCGACATCGTA -3'                                                                                                                                                                           | This study |
| FliC1C-F                     | 5'- CCGGATCCAAACCAGCACCA -3'                                                                                                                                                                           | This study |
| FliC1C-R                     | 5'- GCTCTAGATACGCTGAGCAT -3'                                                                                                                                                                           | This study |
| FliC2C-F                     | 5'- CGTCTAGAAGATCGACGTAT -3'                                                                                                                                                                           | This study |
| FliC2C-R                     | 5'- TGGCATGCGCATTCAACGAC -3'                                                                                                                                                                           | This study |
| FliC3C-F                     | 5'- AAGCATGCCGCAGAACTGA -3'                                                                                                                                                                            | This study |
| FliC3C-R                     | 5'- CAAAGCTTGCCATGTGATTCT -3'                                                                                                                                                                          | This study |
| FliC3-C                      | 5'- CTTGTGCGCGAAGCTCTTG-3'                                                                                                                                                                             | This study |
| FliC1Q178-F                  | 5'- CAGCGATCAACAACAAGCTG-3'                                                                                                                                                                            | This study |
| FliC1Q178-R                  | 5'- GTGCTGGTTTCGGTCAGG-3'                                                                                                                                                                              | This study |
| FliC2Q163-F                  | 5'- TCATATCAACGCCAAGATCG-3'                                                                                                                                                                            | This study |
| FliC2Q163-R                  | 5'- GGTCACGTCGTCGGTGTAG-3'                                                                                                                                                                             | This study |
| SmeXQ-F                      | 5'-TACGACCGCCGCAAGCAACC-3'                                                                                                                                                                             | 4          |
| SmeXQ-R                      | 5'- CAGCTCGAAGTAGTTGCGTGCC-3'                                                                                                                                                                          | 4          |
| rDNA-F                       | 5'- GACCTTGCGCGATTGAATG -3'                                                                                                                                                                            | 4          |
| rDNA-R                       | 5'- CGGATCGTCGCCTTGGT -3'                                                                                                                                                                              | 4          |

1. Hu RM, Huang KJ, Wu LT, Hsiao YJ, Yang TC. 2008. Induction of L1 and L2 beta-lactamases of *Stenotrophomonas maltophilia*. *Antimicrob Agents Chemother* 52:1198-1200.
2. Chen CH, Huang CC, Chung TC, Hu RM, Huang YW, Yang TC. 2011. Contribution of resistance-nodulation-division efflux pump operon *smeU1-V-W-U2-X* to multidrug resistance of *Stenotrophomonas maltophilia*. *Antimicrob. Agents Chemother* 55:5826-5833.
